# Supplementary material
Source: PubMed Central journal article supplement (PMC2719920)
Supplement: JCI37155sd.pdf [file JCI37155sd.pdf]

**Supplemental Table 1:** siRNA sequences. Depicted is the 19 nt portion in the sense strand of the targeted mRNA.

|                    |                      |
|--------------------|----------------------|
| Apaf-1             | CAGAGGCUUCCACUAAUA   |
| Bad                | GGAUGAGUGACGAGUUUGU  |
| Bcl-2              | GGGAGAUAGUGAUGAAGUA  |
| Bcl-w              | GGCAGACUUUGUAGGUUAU  |
| Bcl-x <sub>L</sub> | GGAACUCUAUGGGAACAAU  |
| Bid                | CUUGCUCGUGAUGUCUUU   |
| Bik                | CCACACUUAAGGAGAACAU  |
| Bim                | CUACCUCCUACAGACAGA   |
| caspace 8          | GCUCUUCGAAUAAUAGA    |
| caspace 9          | GAUGCCUGGUUGCUUUAU   |
| FADD               | ACGUCAUAUGUGAUAAUGU  |
| IFNAR              | GAAACCACUGACUGUAUUAU |
| IPS-1              | CCACCUUGAUGCCUGUGAA  |
| MDA-5              | GUAUCGUGUUAUUGGAUUA  |
| Noxa               | AGUCGAGUGUGCUACUCAA  |
| p53                | GUACCACCAUCCACUACAA  |
| PKR                | GAAGGCAGUUAGUCCUUUA  |
| Puma               | CCGAGAUGGAGCCCAAUUA  |
| RIG-I              | AUCACGGAUUAGCGACAAA  |
| TLR3               | CAGCAUCUGUCUUUAAUAA  |
